# Supplementary material
Source: PubMed Central journal article supplement (PMC3516376)
Supplement: supp_jcs.087395_JCS087395.pdf [file supp_jcs.087395_JCS087395.pdf]

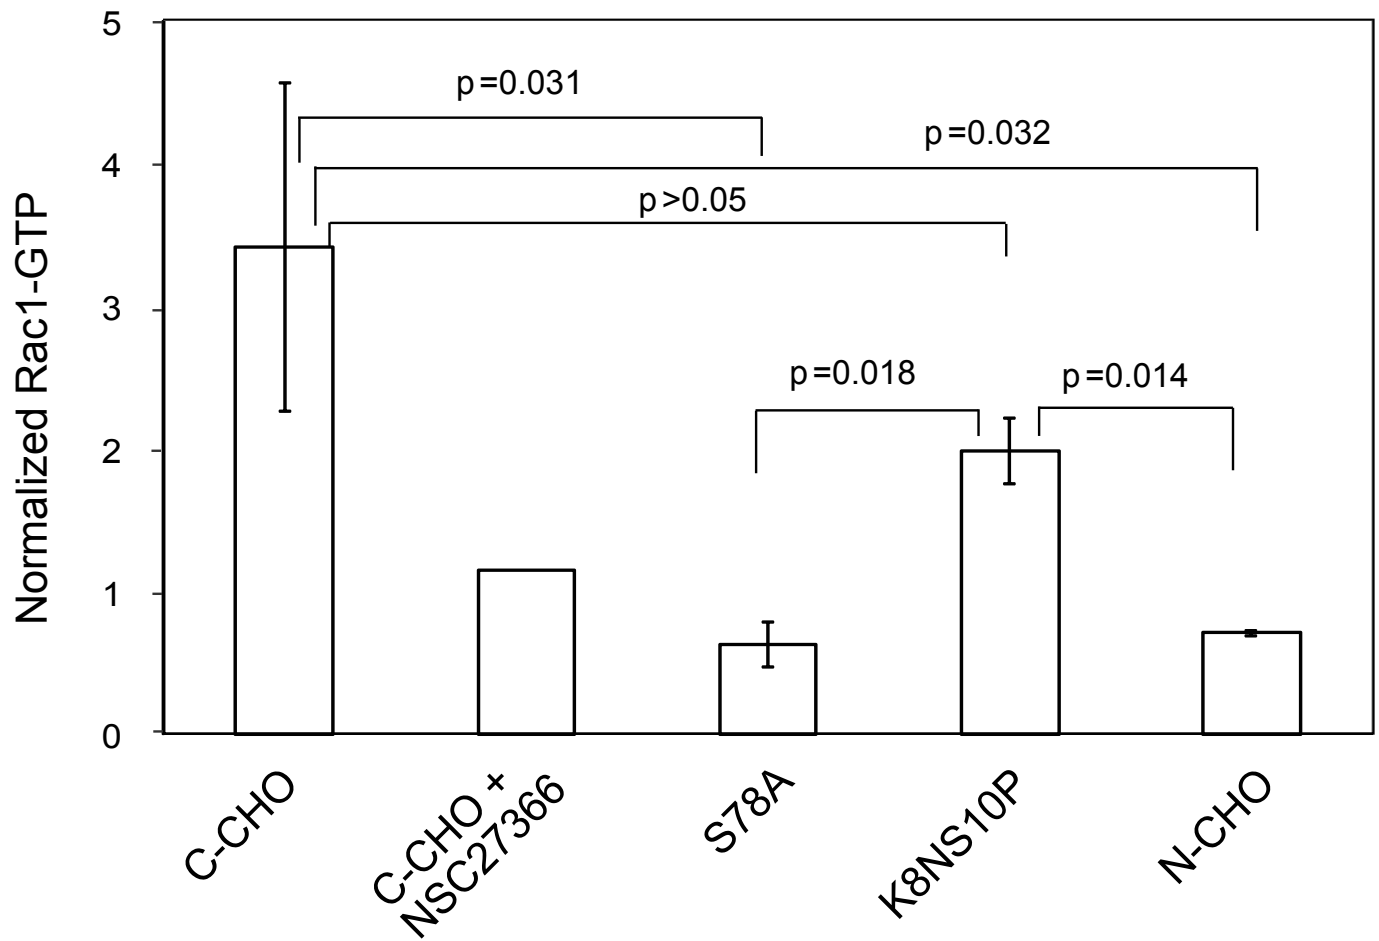

**Fig. S1.** Normalized Rac1-GTP in a confluent cell monolayer measured 45 minutes after activating intercellular junctions with 1.8 mM  $\text{Ca}^{2+}$ . The cadherin subtype expressed on the CHO cell is indicated below each bar. The control was obtained by measuring Rac1-GTP levels, in the presence of the Rac inhibitor NSC23766. Cadherin surface expression levels were similar, and values are given in the main text.

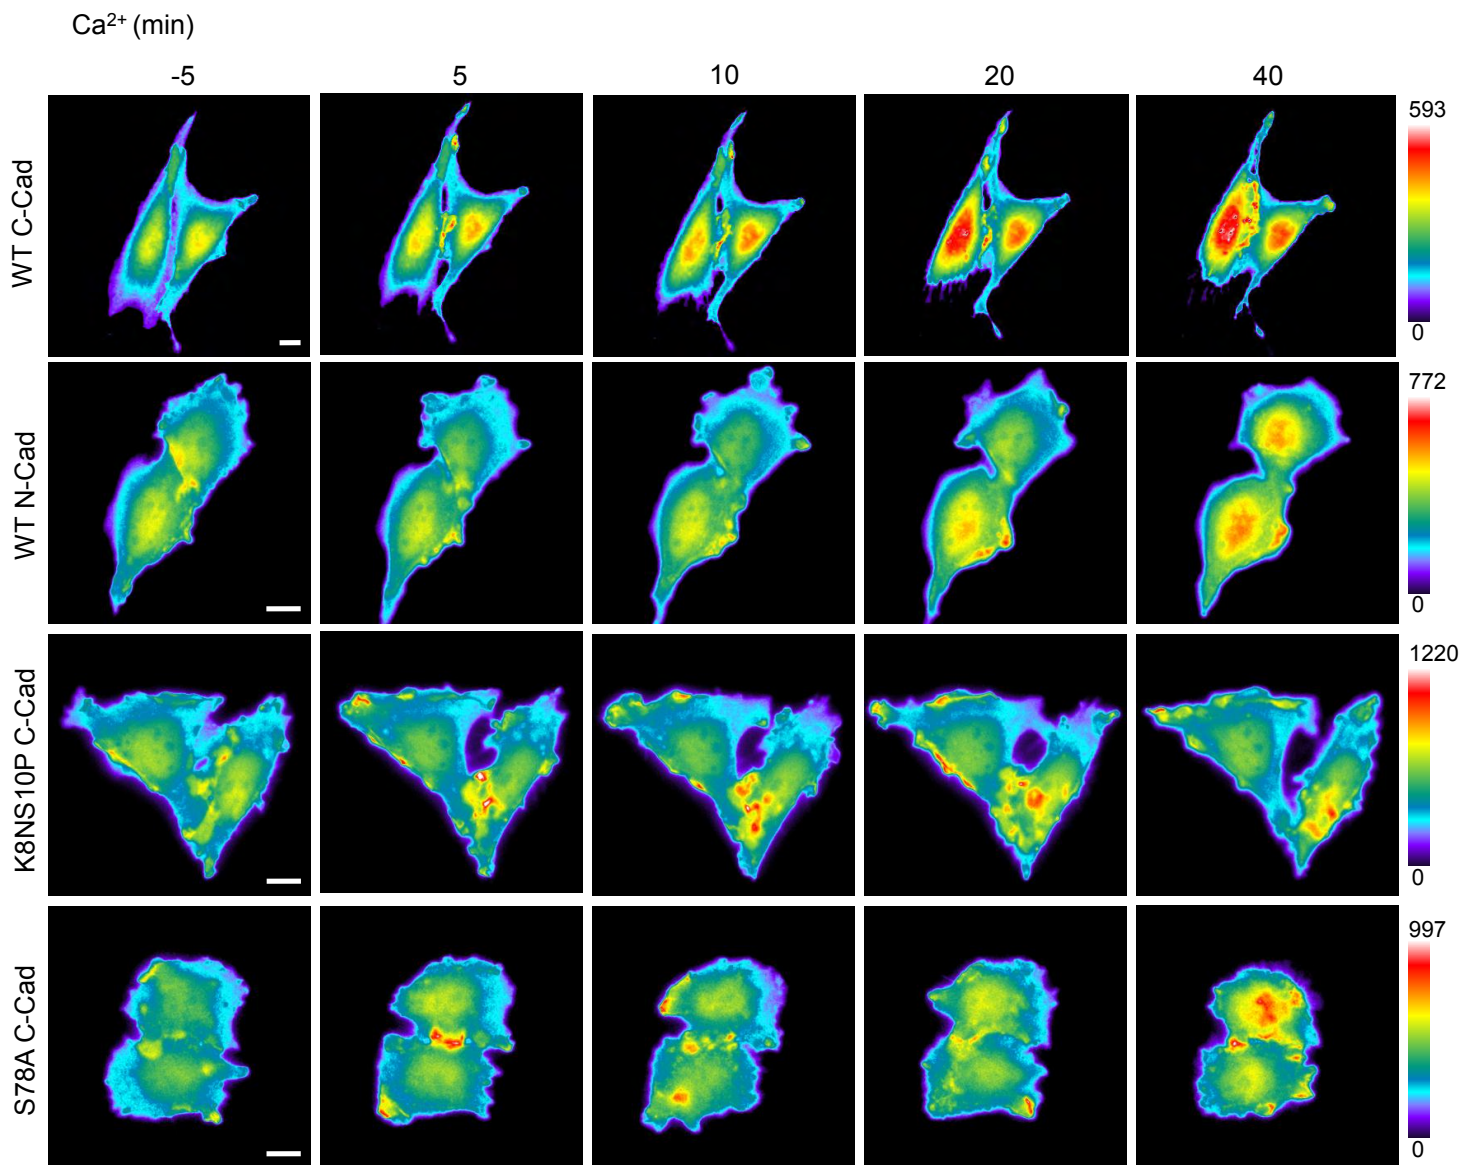

**Fig. S2.** YFP-PBD-PAK localization following intercellular junction activation by calcium addition. Representative time-lapse fluorescence image series of YFP-PBD-PAK, before and after calcium stimulation, in CHO cells that express C-cadherin, N-cadherin, or C-cadherin mutations (K8NS10P, S78A). Images represent at least three series for each condition. Calcium was added at  $t = 0$  minutes. Scale bars: 10  $\mu$ m.

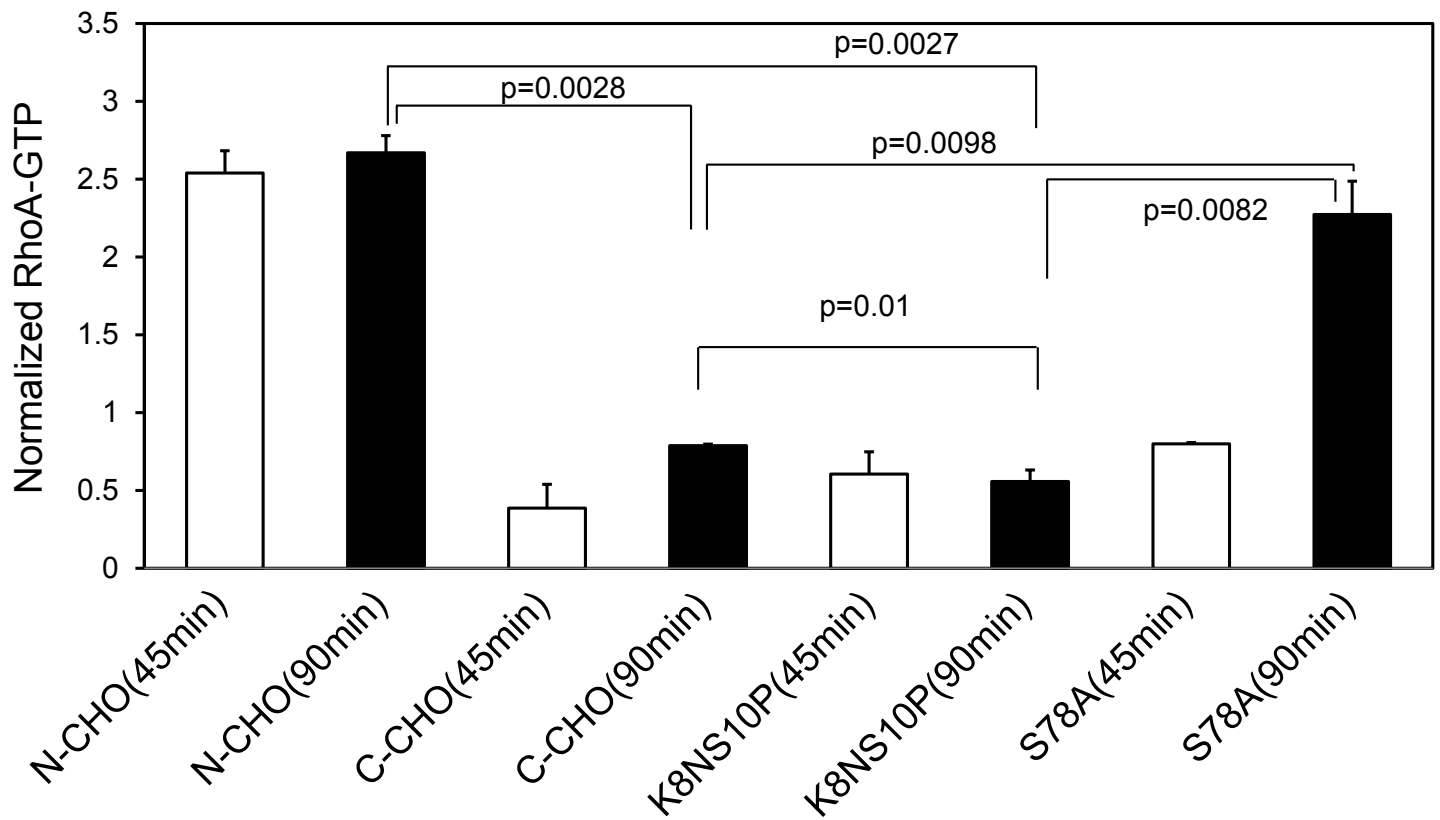

**Fig. S3.** Normalized RhoA-GTP in cells 45 and 90 minutes after activating intercellular junctions with 1.8 mM  $\text{Ca}^{2+}$ . The cadherin subtype expressed on the cells is indicated below each bar. The cadherin expression levels on the different cells are similar. The values are given in the main text.

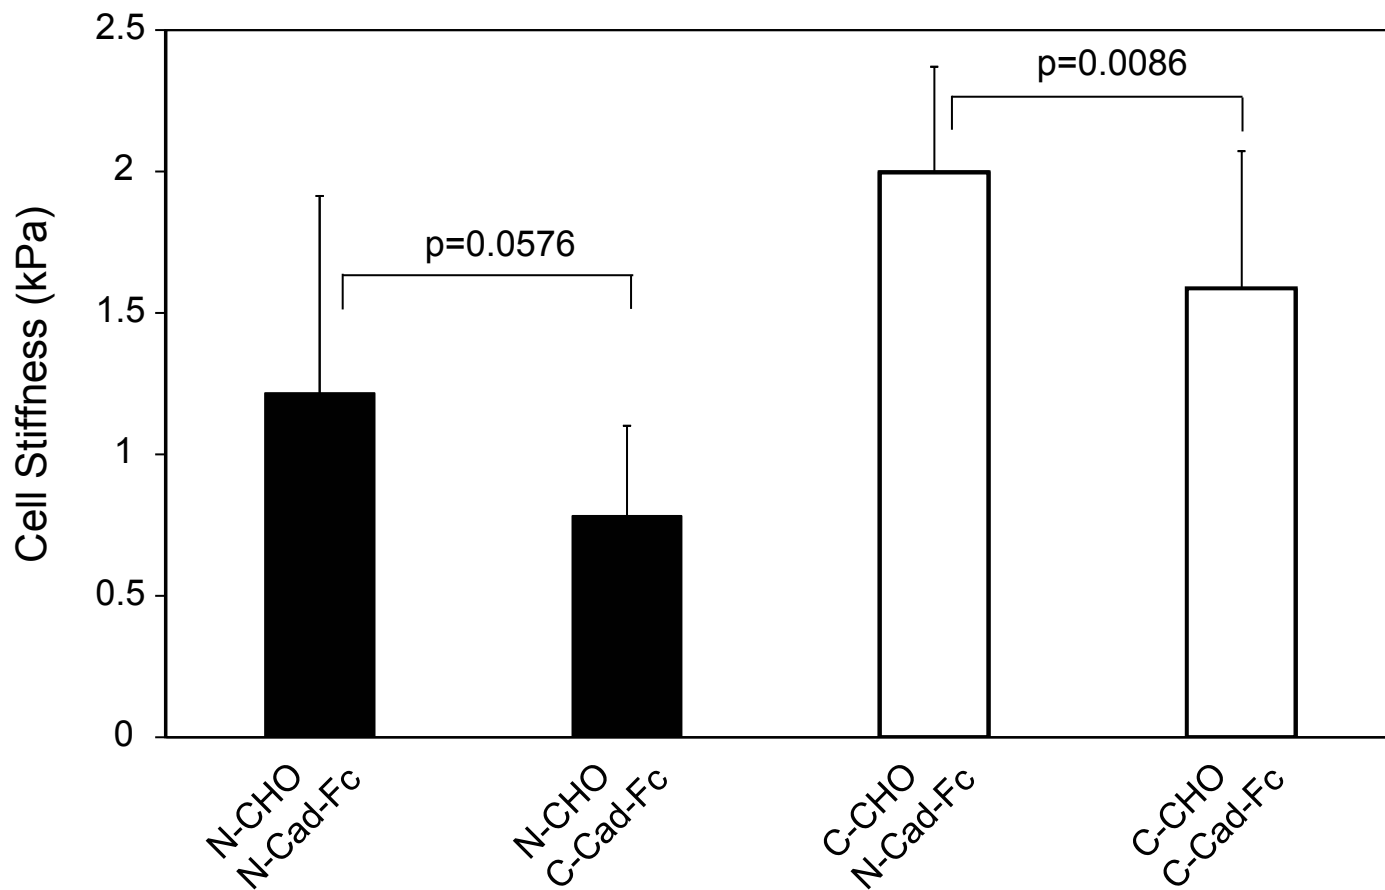

**Fig. S4.** Measured stiffness of single cells cultured on either CEC1-5-Fc or NEC1-5-Fc coated substrata in GMEM containing 0.05 v/v% FBS. Cell stiffness was determined by magnetic twisting cytometry, using beads coated with fibronectin. The cadherin pairs supporting cell adhesion are indicated below the bars.

**Table S1. Rac1-GTP triggered by cell adhesion to ectodomain-coated substrata**

| Cell Line | Substrate Protein | Rac1-GTP Change |
|-----------|-------------------|-----------------|
| N-CHO     | NEC1-5-Fc         | 0.8±0.3         |
| C-CHO     | CEC1-5-Fc         | 6.3±0.3         |
| N-CHO     | CEC1-5-Fc         | 1.2±0.4         |
| S78A      | CEC1-5-Fc         | 0.6±0.2         |
| K8NS10P   | CEC1-5-Fc         | 7±2             |
| M92I      | CEC1-5-Fc         | 4±2             |

**Table S1.** Rac1-GTP triggered by cell adhesion to ectodomain-coated substrata.
